# Supplementary material
Source: PubMed Central journal article supplement (PMC8803127)
Supplement: NIHMS1770903-supplement-Supplementary_Material.pdf [file NIHMS1770903-supplement-Supplementary_Material.pdf]

## Supplementary Materials

### Modeling airway dysfunction in asthma using synthetic mucus biomaterials

Daniel Song, Ethan Iverson, Logan Kaler, Shahed Bader, Margaret A. Scull, Gregg A. Duncan

\*Correspondence to: Gregg Duncan; email: gaduncan@umd.edu

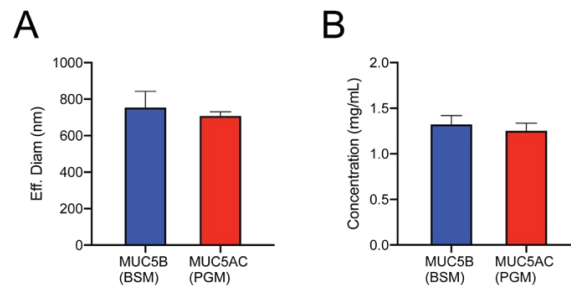

**Fig. S1.** (A) Effective hydrodynamic diameter of MUC5B (BSM) and MUC5AC (PGM) solutions measured in 10 mM NaCl using dynamic light scattering (NanoBrook Omni; Brookhaven Instruments). (B) Concentration of 1% mucin solutions measured using BCA assay.

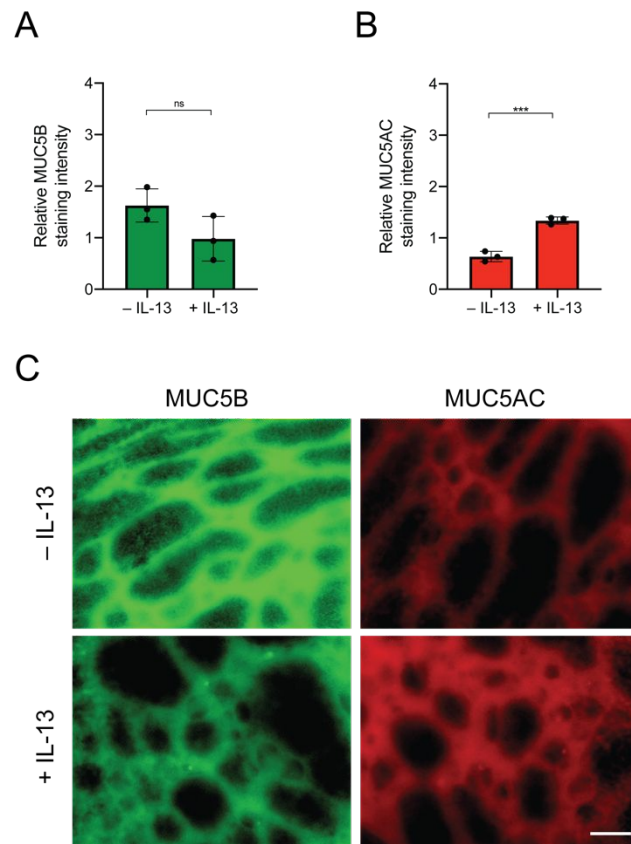

**Fig. S2.** (A) Relative MUC5B staining intensity from *en face* immunostaining. (B) Relative MUC5AC staining intensity. (C) Additional *en face* immunostaining images of mucus gels produced from unstimulated (-IL-13) or IL-13-stimulated (+IL-13) BCI-NS1.1 HAE cultures. Scale bar = 20 μm.

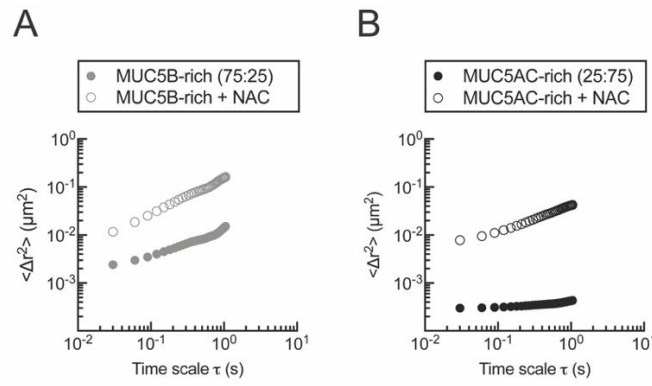

**Fig. S3.** (A) Ensemble average MSD ( $\langle \Delta r^2 \rangle$ ) of 100 nm PEG-NP as a function of time scale ( $\tau$ ) in MUC5B-rich (75:25) gel before and after a 30-minute treatment with *N*-acetyl cysteine (NAC). (B) Ensemble average MSD ( $\langle \Delta r^2 \rangle$ ) of 100 nm PEG-NP as a function of time scale ( $\tau$ ) in MUC5AC-rich (75:25) gel before and after a 30-minute treatment with NAC.
